# Supplementary material
Source: publisher figshare collection journal article supplement (https://frontiersin.figshare.com/ndownloader/files/15338027)
Supplement: Supplementary file 1 [file 15338027]

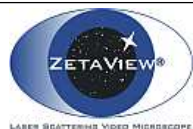

Operator (Report): lenovo

Video Operator: lenovo

### Sample Parameters

Sample Name: No5-LZL  
Comment: Sample Remarks0: Sens:70,Shutter:70  
Sample Remarks1:  
Sample Remarks2:  
Electrolyte: PBS  
Temperature: 24.96 °C sensed  
pH 7.4 entered  
Conductivity: 15000.00 µS/cm sensed

### Result (sizes in nm)

|              | Number | Concentration | Volume |
|--------------|--------|---------------|--------|
| Median (X50) | 125.3  | 125.3         | 186.0  |
| Span         | 52.6   | 52.6          | 108.3  |

Concentration: 6.2E+7 Particles / mL  
Dilution Factor: 120  
Original Concentration: 7.4E+9 Particles / mL

### Measurement Parameters

Cell S/N: ZNTA

### Measurement Mode: Size Distribution 5 Cycles

11 Positions

### Quality

Average Counted Particles per Frame: 137

Number of Traced Particles: 2458

### Analysis Parameters

Max Area: 1000, Min Area: 5, Min Brightness: 20

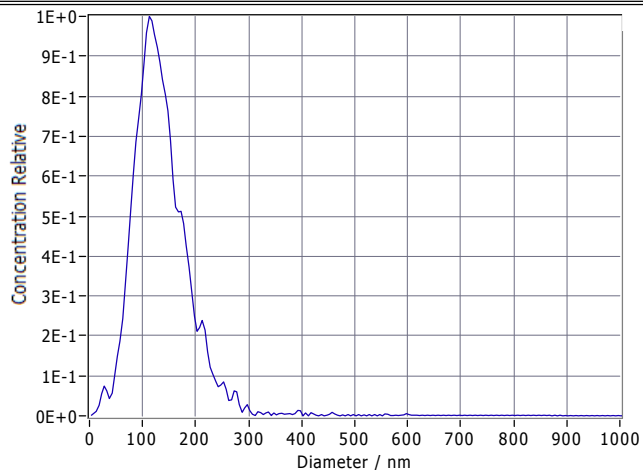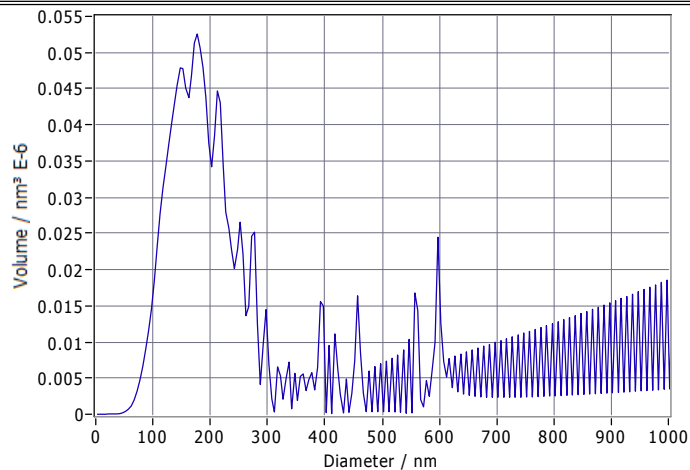

### Peak Analysis (Concentration)

| Diameter / nm | Particles/mL | FWHM / nm | Percentage |
|---------------|--------------|-----------|------------|
| 116.1         | 2.9E+6       | 97.9      | 97.8       |
| 393.0         | 3.9E+4       | 11.6      | 0.3        |
| 337.1         | 2.8E+4       | 30.0      | 0.2        |
| 457.3         | 2.5E+4       | 9.6       | 0.1        |
| 417.7         | 2.3E+4       | 2.1       | 0.1        |

### X Values

|        | Number | Concentration | Volume |
|--------|--------|---------------|--------|
| X10    | 75.4   | 75.4          | 117.5  |
| X50    | 125.3  | 125.3         | 186.0  |
| X90    | 196.8  | 196.8         | 365.7  |
| Span   | 1.0    | 1.0           | 1.3    |
| Mean   | 135.0  | 135.0         | 216.4  |
| StdDev | 52.6   | 52.6          | 108.3  |

Comment

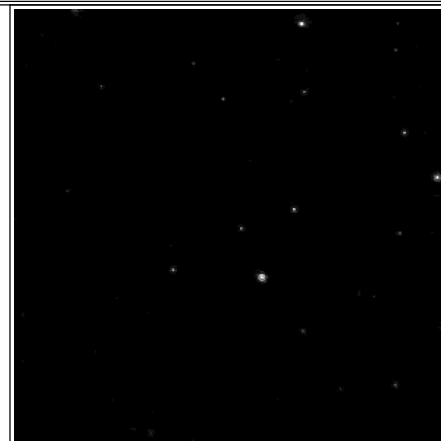

(Signature)

Analyzed Video: E:\Results-17-315\NanJing Military Hospital-180604\20180604\_0006\_No5-LZL\_size.avi
